# Supplementary material for: Highly energy-efficient hydrogenolysis of high-density polyethylene via hydrogen nonthermal plasma reaction engineering
Source: Royal Society of Chemistry journal article supplement (doi:10.1039/d5gc04228c), 2025-01-01
Supplement: d5gc04228c1.pdf [file d5gc04228c1.pdf]

Supplementary Information for:

**Highly Energy-Efficient Hydrogenolysis of High-Density Polyethylene via Hydrogen Nonthermal Plasma Reaction Engineering**

Parsa Pishva,<sup>a</sup> Jinyao Tang,<sup>a</sup> Yanlin Zhu,<sup>a</sup> Jochen Lauterbach<sup>a</sup> and Zhenmeng Peng<sup>\*a</sup>

<sup>a</sup> Department of Chemical Engineering, University of South Carolina, Columbia, SC 29208, United States

\* Corresponding author. Tel: +1(803)777-7959. Email address: [zmpeng@sc.edu](mailto:zmpeng@sc.edu)

Number of pages: 16

Number of figures: 10

Number of tables: 2

Number of equations: 4

## Supplementary Information contents:

**Figure S1.** Waste pill bottles made of HDPE used for nonthermal plasma-assisted hydrogenolysis reaction.

**Figure S2.** Maximum reaction temperature measured by an infrared thermal camera.

**Figure S3.** Mass spectrum of the gas product of nonthermal H<sub>2</sub> plasma-assisted hydrogenolysis of HDPE (reactor OD=17mm, PZL=8cm, loading density=0.188g/cm<sup>3</sup>, reaction time=10min, and input power=60W).

**Figure S4.** The effect of DBD reactor OD on the hydrogen utilization of nonthermal plasma-assisted hydrogenolysis of HDPE (PZL=8cm, loading=2g, reaction time=10min, and input power=60W).

**Figure S5.** The effect of loading at PZL=8cm and DBD reactor OD=50mm on the hydrogen utilization of nonthermal plasma-assisted hydrogenolysis of HDPE (reaction time=10min and input power=60W).

**Figure S6.** The effect of loading at different PZL on the hydrogen utilization of nonthermal plasma-assisted hydrogenolysis of HDPE (DBD reactor OD=50mm, reaction time=10min, and input power=60W).

**Figure S7.** The effect of input power on the hydrogen utilization of nonthermal plasma-assisted hydrogenolysis of HDPE (DBD reactor OD=50mm, reaction time=10min, and loading=54g).

**Figure S8.** Effect of reaction time on MALDI spectra of wax products of nonthermal plasma-assisted hydrogenolysis of HDPE (DBD reactor OD=50mm, input power=60W and loading=54g).

**Figure S9.** The effect of reaction time on the hydrogen utilization of nonthermal plasma-assisted hydrogenolysis of HDPE (DBD reactor OD=50mm, input power=60W, and loading=54g).

**Figure S10.** Comparison of hydrogen utilization of nonthermal plasma-assisted hydrogenolysis of HDPE and HDPE pill bottles waste (DBD reactor OD=50mm, input power=60W, and loading=54g).

**Table S1.** The heat of combustion of all gas products of HDPE hydrogenolysis.

**Table S2.** Thermodynamic properties for all reactants and products of HDPE hydrogenolysis.

**Eq. S1.** Calculation of input due to hydrogen consumption.

**Eq. S2.** Calculation of electrical input energy.

**Eq. S3.** Calculation of output energy of each gas product.

**Eq. S4.** Electric energy cost per 1 gram of HDPE

## References

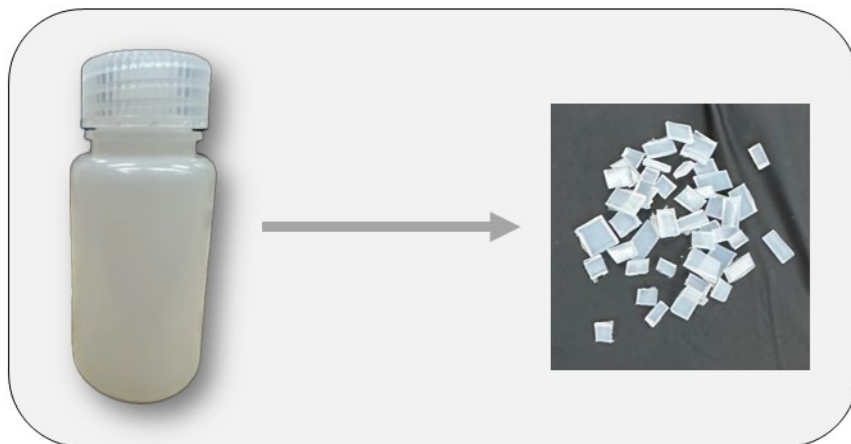

Figure S1. Waste pill bottles made of HDPE used for nonthermal plasma-assisted hydrogenolysis reaction.

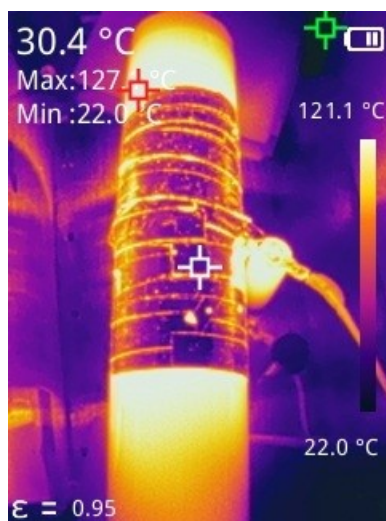

Figure S2. Maximum reaction temperature measured by an infrared thermal camera.

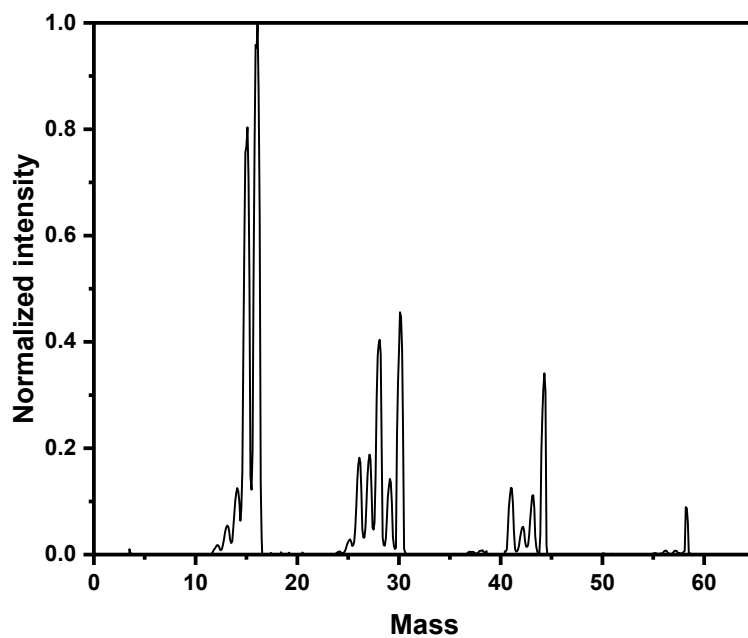

Figure S3. Mass spectrum of the gas product of nonthermal H<sub>2</sub> plasma-assisted hydrogenolysis of HDPE (rector OD=17mm, PZL=8cm, loading density=0.188g/cm<sup>3</sup>, reaction time=10min, and input power=60W).

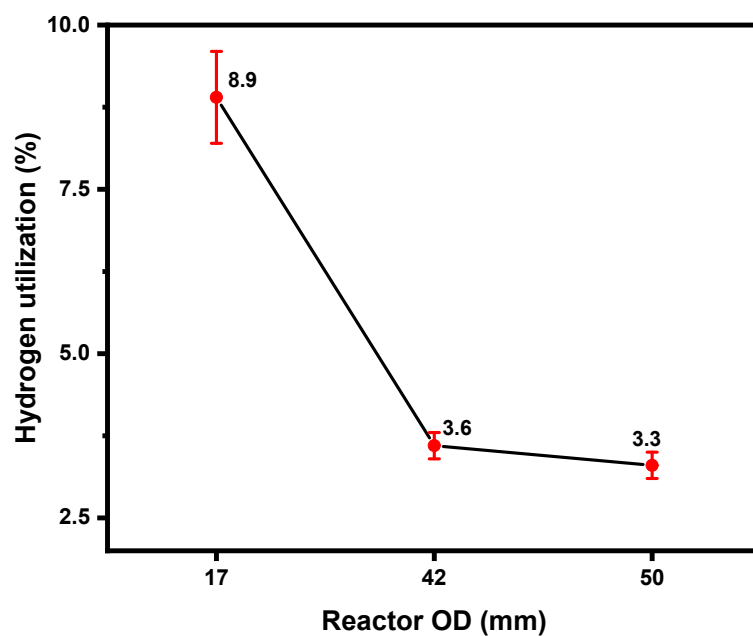

Figure S4. The effect of DBD reactor OD on the hydrogen utilization of nonthermal plasma-assisted hydrogenolysis of HDPE (PZL=8cm, loading=2g, reaction time=10min, and input power=60W).

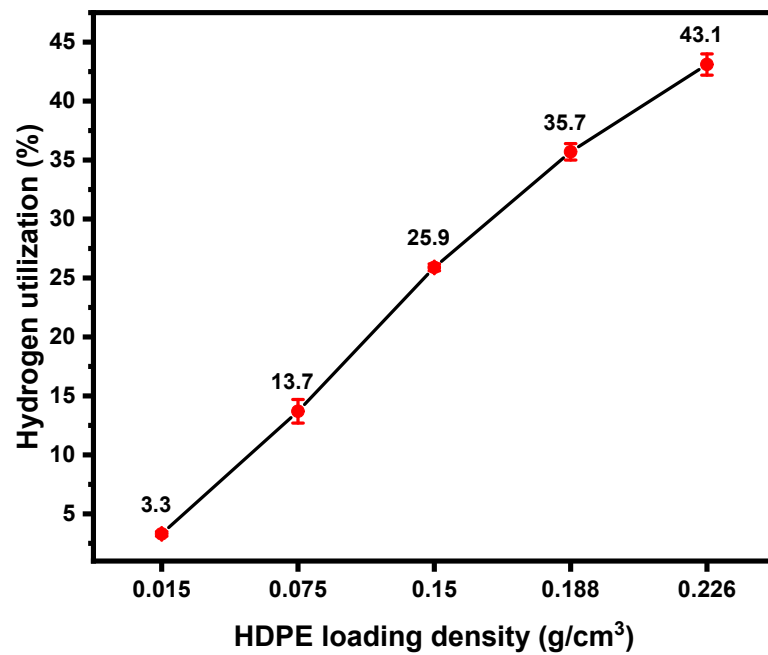

Figure S5. The effect of HDPE loading density at PZL=8cm and DBD reactor OD=50mm on the hydrogen utilization of nonthermal plasma-assisted hydrogenolysis of HDPE (reaction time=10min and input power=60W).

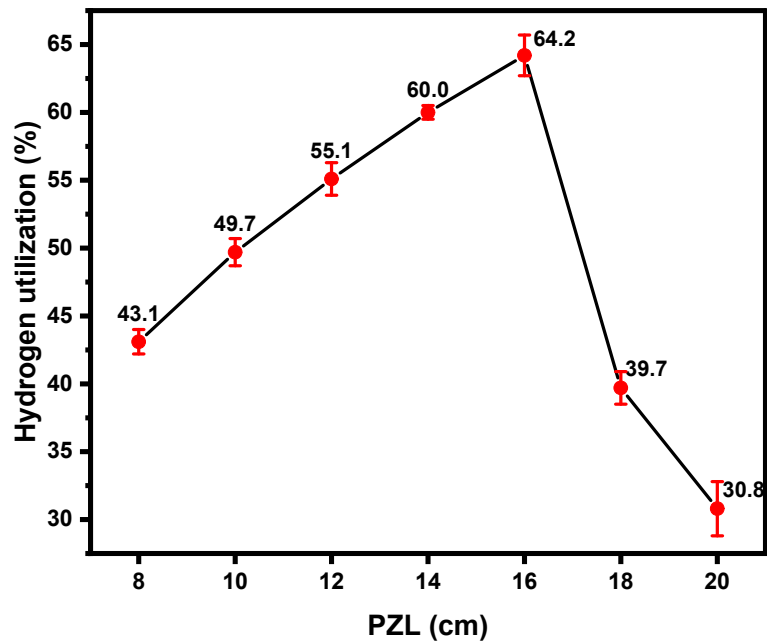

Figure S6. The effect of PZL on the hydrogen utilization of nonthermal plasma-assisted hydrogenolysis of HDPE (DBD reactor OD=50mm, reaction time=10min, and input power=60W).



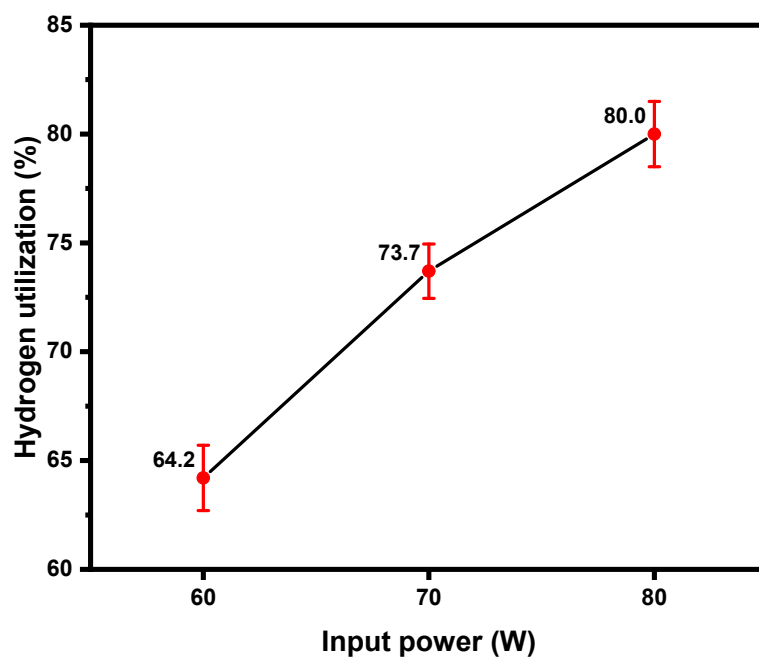

Figure S7. The effect of input power on the hydrogen utilization of nonthermal plasma-assisted hydrogenolysis of HDPE (DBD reactor OD=50mm, reaction time=10min, and loading=54g).

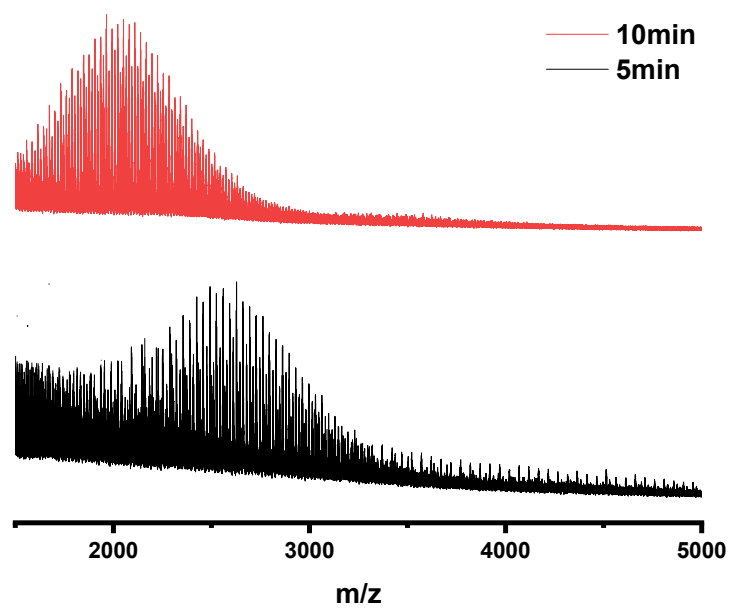

Figure S8. Effect of reaction time on MALDI spectra of wax products of nonthermal plasma-assisted hydrogenolysis of HDPE (DBD reactor OD=50mm, input power=60W and loading=54g).

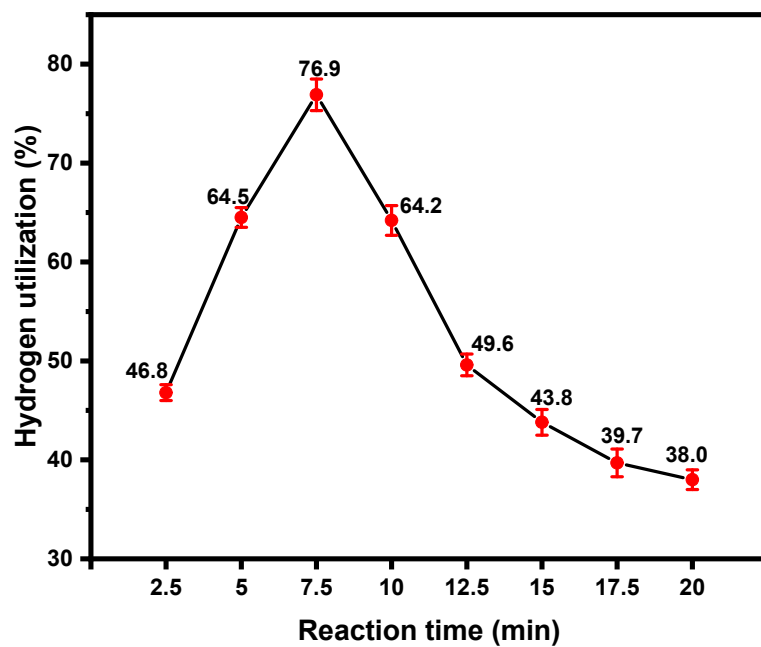

Figure S9. The effect of reaction time on the hydrogen utilization of nonthermal plasma-assisted hydrogenolysis of HDPE (DBD reactor OD=50mm, input power=60W, and loading=54g).

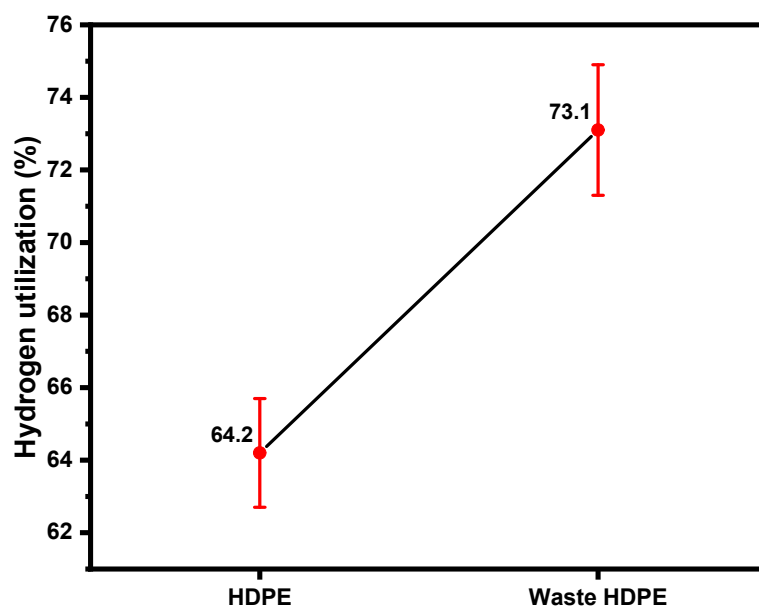

Figure S10. Comparison of hydrogen utilization of nonthermal plasma-assisted hydrogenolysis of HDPE and HDPE pill bottles waste (DBD reactor OD=50mm, input power=60W, and loading=54g).

Table S1. The heat of combustion of all gas products of HDPE hydrogenolysis [1].

| Gas product                    | Heat of combustion (kJ/g) |
|--------------------------------|---------------------------|
| CH <sub>4</sub>                | -55.6                     |
| C <sub>2</sub> H <sub>2</sub>  | -11.8                     |
| C <sub>2</sub> H <sub>4</sub>  | -50.3                     |
| C <sub>2</sub> H <sub>6</sub>  | -51.9                     |
| C <sub>3</sub> H <sub>6</sub>  | -49                       |
| C <sub>3</sub> H <sub>8</sub>  | -50.3                     |
| C <sub>4</sub> H <sub>10</sub> | -49.5                     |

Table S2. Thermodynamic properties for all reactants and products of HDPE hydrogenolysis [1,2].

| Properties                    | H (kJ/mol) | S (J/mol/K) | H-TS (kJ/mol) |
|-------------------------------|------------|-------------|---------------|
| CH <sub>4</sub>               | -74.9      | 188.7       | -131.1        |
| C <sub>2</sub> H <sub>2</sub> | 226.7      | 200.9       | 166.8         |
| C <sub>2</sub> H <sub>4</sub> | 54.5       | 219.3       | -10.9         |
| C <sub>2</sub> H <sub>6</sub> | -84.0      | 229.6       | -152.4        |
| C <sub>3</sub> H <sub>6</sub> | 20.4       | 266.9       | -59.1         |
| C <sub>3</sub> H <sub>8</sub> | -104.7     | 269.9       | -185.1        |
| PE                            | 7.0        | 28.3        | -1.5          |
| H <sub>2</sub>                | 0.0        | 114.7       | -34.2         |

*Input energy due to hydrogen consumption(kJ)*

$$= \text{moles of hydrogen reacted (mol)} \times 22.4\left(\frac{\text{mol}}{\text{l}}\right) \times 12.78\left(\frac{\text{kJ}}{\text{l}}\right)$$

(Eq. S1)

*Electrical input energy(kJ) = input power(W) × reaction time (s)*

(Eq. S2)

*Output energy of each gas product(kJ) = mass (g) × heat of combustion( $\frac{\text{kJ}}{\text{g}}$ )*

(Eq. S3)

*Electric energy cost per 1 gram of HDPE =  $\frac{\text{Power (kW)} \times \text{Time(h)}}{\text{HDPE loading}} \times 14.41 \frac{\text{cents}}{\text{kWh}}$*

(Eq. S4)

## References

- 1 NIST Standard Reference Database Number 69. DOI: <https://doi.org/10.18434/T4D303>.
- 2 U. Gaur and B. Wunderlich, *J Phys Chem Ref*, 1981, **10** 119-152.  
<https://doi.org/10.1063/1.555677>.
